# Supplementary material for: High-Performance and Water Resistant PVA-Based Films Modified by Air Plasma Treatment
Source: MDPI journal article supplement (doi:10.3390/membranes12030249), 2022-02-22
Supplement: s1 [file s1]

## Supplementary materials

### High-performance and water resistant PVA-based films modified by air plasma treatment

Xin Rao <sup>1,2</sup>, Qi Zhou <sup>1,2</sup>, Qin Wen <sup>1,2</sup>, Zhiqiang Ou <sup>1,2</sup>, Lingying Fu <sup>1,2</sup>, Yue Gong <sup>1,2</sup>,  
Xueyu Du <sup>1,2,\*</sup> and Chunqing Huo <sup>3,\*</sup>

- <sup>1</sup> Hainan Provincial Fine Chemical Engineering Research Center, Hainan University, Haikou 570228, China; 1632110422@qq.com (X.R.); qduzhouqi@163.com (Q.Z.); wenqin\_hg@hainanu.edu.cn (Q.W.); 895370225@qq.com (Z.O.); 821423846@qq.com (L.F.); 3466067419@qq.com (Y.G.)
- <sup>2</sup> Hainan Provincial Key Lab of Fine Chemistry, Hainan University, Haikou, Hainan 570228, China.
- <sup>3</sup> School of Materials Science and Engineering, Hainan University, Haikou, Hainan 570228, China.
- \* Correspondence: duxueyu@hainanu.edu.cn (X.D.); chunqinghuo@hainanu.edu.cn (C.H.)

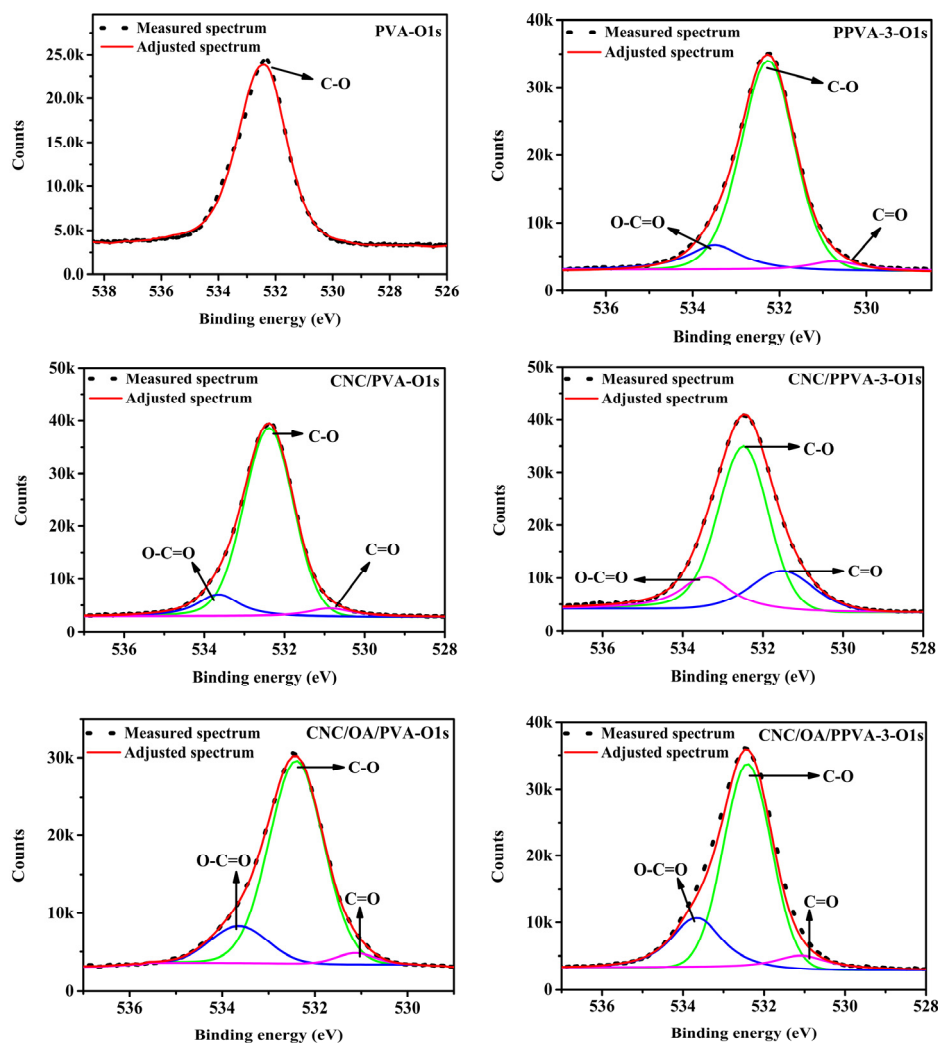

**Figure S1.** High resolution XPS spectra of O1s of different films without and with air plasma treatment.

**Table S1.** The temperature at 10% weight loss and residual mass of different PVA-based films.

| Samples       | Temperature at 10% weight loss (°C) | Residual mass (%) |
|---------------|-------------------------------------|-------------------|
| PVA           | 264                                 | 22.6              |
| PPVA-3        | 267                                 | 8.9               |
| CNC/PVA       | 271                                 | 24.7              |
| CNC/PPVA-3    | 278                                 | 26.1              |
| CNC/OA/PVA    | 237                                 | 11.1              |
| CNC/OA/PPVA-3 | 252                                 | 15.5              |

**Table S2.**  $T_{\text{onset}}$  and  $T_{\text{DTGmax}}$  values of major weight-loss stages of different PVA-based films.

| Samples       | Major weight-loss periods  |                          |                            |                          |
|---------------|----------------------------|--------------------------|----------------------------|--------------------------|
|               | The 1 <sup>st</sup> period |                          | The 2 <sup>nd</sup> period |                          |
|               | $T_{\text{onset}}$ (°C)    | $T_{\text{DTGmax}}$ (°C) | $T_{\text{onset}}$ (°C)    | $T_{\text{DTGmax}}$ (°C) |
| PVA           | 216                        | 281                      | 382                        | 431                      |
| PPVA-3        | 216                        | 282                      | 382                        | 440                      |
| CNC/PVA       | 207                        | 297                      | 389                        | 429                      |
| CNC/PPVA-3    | 208                        | 294                      | 384                        | 428                      |
| CNC/OA/PVA    | 259                        | 369                      | 414                        | 436                      |
| CNC/OA/PPVA-3 | 259                        | 369                      | 413                        | 437                      |

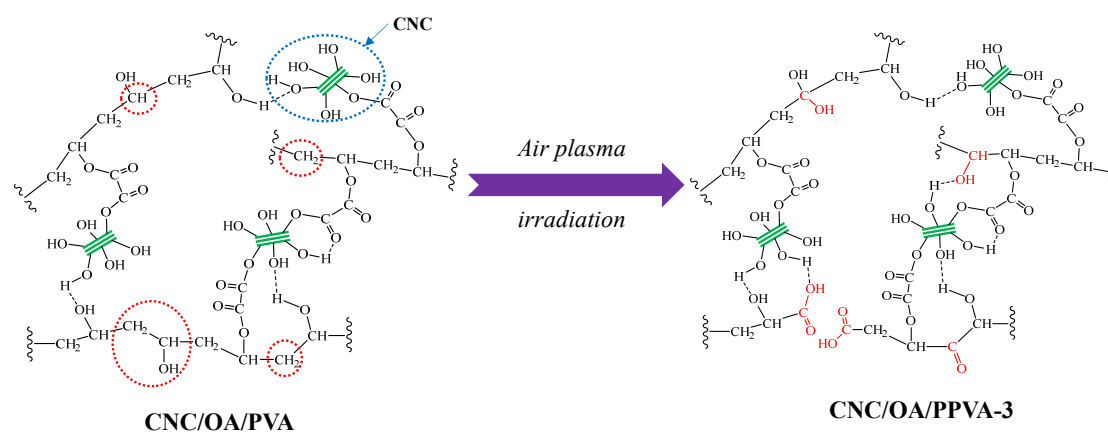**Figure S2.** A possible reaction mechanism for air plasma treatment of CNC/OA/PVA film. The groups/linkages before and after air plasma treatment are marked with red-dashed circles and in red font color, respectively.
